# Supplementary material for: Pharmacokinetics of Fentanyl Sublingual Spray in Opioid-Naïve Participants: Results of a Phase 1, Multiple Ascending Dose Study
Source: PubMed Central journal article supplement — Clin Drug Investig. 2018 Jun 16;38(8):715–26. doi: 10.1007/s40261-018-0658-9 (PMC6061414; doi:10.1007/s40261-018-0658-9), 2018-06-16
Supplement: 40261_2018_658_MOESM1_ESM.pdf [file 40261_2018_658_MOESM1_ESM.pdf]

**Pharmacokinetics of Fentanyl Sublingual Spray in Opioid-Naïve Participants: Results of a  
Phase 1, Multiple Ascending Dose Study**

Richard L. Rauck, MD<sup>1\*</sup> • D. Alexander Oh, PhD<sup>2</sup> • Neil Singla, MD<sup>3</sup> • Christian Koch, MD<sup>3</sup> •  
Neha Parikh<sup>2</sup> • Srinivas Nalamachu, MD<sup>4</sup> • Jin Yu, PharmD<sup>2</sup> • Steven James, MD<sup>2</sup>

**Supplemental Tables**

**Supplemental Table 1** Demographic and baseline characteristics for participants treated with fentanyl sublingual spray 100 mcg (safety population)

| Characteristic            | Safety population                |                                  |                                  |                                    |
|---------------------------|----------------------------------|----------------------------------|----------------------------------|------------------------------------|
|                           | Cohort 1<br>100 mcg q4h<br>(N=6) | Cohort 2<br>100 mcg q2h<br>(N=6) | Cohort 3<br>100 mcg q1h<br>(N=6) | Cohort 4<br>100 mcg q0.5h<br>(N=6) |
| Age, y                    |                                  |                                  |                                  |                                    |
| n                         | 6                                | 6                                | 6                                | 6                                  |
| Mean (SD)                 | 37.3 (8.26)                      | 32.3 (7.23)                      | 31.5 (4.93)                      | 30.3 (7.58)                        |
| Median                    | 38.5                             | 31.0                             | 31.0                             | 32.0                               |
| Min, Max                  | 27, 45                           | 24, 45                           | 26, 39                           | 21, 39                             |
| Sex, n (%)                |                                  |                                  |                                  |                                    |
| Male                      | 5 (83.3)                         | 5 (83.3)                         | 4 (66.7)                         | 6 (100.0)                          |
| Female                    | 1 (16.7)                         | 1 (16.7)                         | 2 (33.3)                         | 0                                  |
| Race, n (%)               |                                  |                                  |                                  |                                    |
| Asian                     | 0                                | 0                                | 0                                | 1 (16.7)                           |
| Black or African American | 4 (66.7)                         | 2 (33.3)                         | 4 (66.7)                         | 3 (50.0)                           |
| White                     | 2 (33.3)                         | 3 (50.0)                         | 2 (33.3)                         | 2 (33.3)                           |
| Other                     | 0                                | 1 (16.7)                         | 0                                | 0                                  |
| Ethnicity, n (%)          |                                  |                                  |                                  |                                    |
| Hispanic or Latino        | 2 (33.3)                         | 1 (16.7)                         | 0                                | 2 (33.3)                           |
| Non-Hispanic / Non-Latino | 4 (66.7)                         | 5 (83.3)                         | 6 (100.0)                        | 4 (66.7)                           |

|                          |                |                 |                |                 |
|--------------------------|----------------|-----------------|----------------|-----------------|
| Weight (kg)              |                |                 |                |                 |
| n                        | 6              | 6               | 6              | 6               |
| Mean (SD)                | 86.73 (16.377) | 74.62 (15.946)  | 76.92 (9.740)  | 81.15 (10.287)  |
| Median                   | 91.40          | 75.52           | 74.62          | 84.14           |
| Min, Max                 | 65.3, 102.1    | 54.4, 92.1      | 67.6, 91.2     | 61.0, 89.8      |
| Height (cm)              |                |                 |                |                 |
| n                        | 6              | 6               | 6              | 6               |
| Mean (SD)                | 179.28 (9.173) | 175.79 (10.688) | 176.95 (8.820) | 177.08 (10.892) |
| Median                   | 183.52         | 178.44          | 177.42         | 178.44          |
| Min, Max                 | 167.6, 188.0   | 159.4, 189.2    | 167.6, 190.0   | 160.0, 192.0    |
| BMI (kg/m <sup>2</sup> ) |                |                 |                |                 |
| n                        | 6              | 6               | 6              | 6               |
| Mean (SD)                | 26.75 (2.886)  | 23.90 (2.961)   | 24.66 (3.294)  | 25.86 (2.415)   |
| Median                   | 26.64          | 23.55           | 25.09          | 25.93           |
| Min, Max                 | 23.2, 29.8     | 19.4, 28.3      | 18.7, 27.9     | 22.9, 29.7      |
| Body Temperature (°C)    |                |                 |                |                 |
| n                        | 6              | 6               | 6              | 6               |
| Mean (SD)                | 37.07 (0.082)  | 36.73 (0.197)   | 36.67 (0.339)  | 36.82 (0.264)   |
| Median                   | 37.05          | 36.80           | 36.65          | 36.80           |
| Min, Max                 | 37.0, 37.2     | 36.4, 36.9      | 36.1, 37.1     | 36.4, 37.1      |

---

*q* every; *SD* standard deviation; *BMI* body mass index

**Supplemental Table 2** Demographic and baseline characteristics for participants treated with fentanyl sublingual spray 200 mcg (safety population)

| Characteristic            | Safety population                |                                  |                                  |                                    |
|---------------------------|----------------------------------|----------------------------------|----------------------------------|------------------------------------|
|                           | Cohort 1<br>200 mcg q4h<br>(N=6) | Cohort 2<br>200 mcg q2h<br>(N=6) | Cohort 3<br>200 mcg q1h<br>(N=6) | Cohort 4<br>200 mcg q0.5h<br>(N=6) |
| <b>Age, y</b>             |                                  |                                  |                                  |                                    |
| n                         | 6                                | 6                                | 6                                | 6                                  |
| Mean (SD)                 | 43.5 (9.07)                      | 44.3 (11.25)                     | 31.7 (10.71)                     | 41.2 (10.55)                       |
| Median                    | 47.5                             | 50.5                             | 29.5                             | 44.5                               |
| Min, Max                  | 31, 51                           | 28, 54                           | 20, 52                           | 25, 55                             |
| <b>Sex, n (%)</b>         |                                  |                                  |                                  |                                    |
| Male                      | 6 (100.0)                        | 5 (83.3)                         | 2 (33.3)                         | 2 (33.3)                           |
| Female                    | 0                                | 1 (16.7)                         | 4 (66.7)                         | 4 (66.7)                           |
| <b>Race, n (%)</b>        |                                  |                                  |                                  |                                    |
| Asian                     | 1 (16.7)                         | 0                                | 1 (16.7)                         | 0                                  |
| Black or African American | 2 (33.3)                         | 3 (50.0)                         | 1 (16.7)                         | 1 (16.7)                           |
| White                     | 3 (50.0)                         | 3 (50.0)                         | 4 (66.7)                         | 4 (66.7)                           |
| Other                     | 0                                | 0                                | 0                                | 1 (16.7)                           |
| <b>Ethnicity, n (%)</b>   |                                  |                                  |                                  |                                    |
| Hispanic or Latino        | 3 (50.0)                         | 1 (16.7)                         | 1 (16.7)                         | 2 (33.3)                           |
| Non-Hispanic / Non-Latino | 3 (50.0)                         | 5 (83.3)                         | 5 (83.3)                         | 4 (66.7)                           |

|                          |                 |                |                |                |
|--------------------------|-----------------|----------------|----------------|----------------|
| Weight (kg)              |                 |                |                |                |
| n                        | 6               | 6              | 6              | 6              |
| Mean (SD)                | 74.88 (11.605)  | 76.18 (10.558) | 63.88 (9.081)  | 75.30 (4.919)  |
| Median                   | 72.42           | 78.70          | 64.19          | 74.62          |
| Min, Max                 | 59.9, 91.7      | 61.1, 88.5     | 51.0, 78.9     | 69.4, 81.2     |
| Height (cm)              |                 |                |                |                |
| n                        | 6               | 6              | 6              | 6              |
| Mean (SD)                | 174.41 (12.155) | 169.59 (6.637) | 167.29 (9.068) | 168.17 (7.935) |
| Median                   | 176.91          | 168.28         | 165.10         | 169.23         |
| Min, Max                 | 152.4, 188.0    | 160.0, 177.8   | 156.2, 182.9   | 157.5, 177.8   |
| BMI (kg/m <sup>2</sup> ) |                 |                |                |                |
| n                        | 6               | 6              | 6              | 6              |
| Mean (SD)                | 24.57 (2.388)   | 26.54 (3.849)  | 22.81 (2.496)  | 26.73 (2.479)  |
| Median                   | 24.40           | 26.21          | 22.96          | 26.87          |
| Min, Max                 | 21.7, 28.0      | 21.3, 31.5     | 18.7, 26.4     | 22.8, 29.6     |
| Body Temperature (°C)    |                 |                |                |                |
| n                        | 6               | 6              | 6              | 6              |
| Mean (SD)                | 36.72 (0.313)   | 36.78 (0.343)  | 36.83 (0.258)  | 36.93 (0.225)  |
| Median                   | 36.75           | 36.85          | 36.80          | 37.05          |
| Min, Max                 | 36.2, 37.0      | 36.2, 37.1     | 36.6, 37.1     | 36.6, 37.1     |

---

*q* every; *SD* standard deviation; *BMI* body mass index

**Supplemental Table 3** Demographic and baseline characteristics for participants treated with fentanyl sublingual spray 400 mcg (safety population)

| Characteristic            | Safety population                |                                  |                                  |                                    |
|---------------------------|----------------------------------|----------------------------------|----------------------------------|------------------------------------|
|                           | Cohort 1<br>400 mcg q4h<br>(N=6) | Cohort 2<br>400 mcg q2h<br>(N=6) | Cohort 3<br>400 mcg q1h<br>(N=6) | Cohort 4<br>400 mcg q0.5h<br>(N=6) |
| <b>Age, y</b>             |                                  |                                  |                                  |                                    |
| n                         | 6                                | 6                                | 6                                | 6                                  |
| Mean (SD)                 | 34.8 (10.15)                     | 37.7 (13.03)                     | 36.7 (8.76)                      | 39.3 (6.12)                        |
| Median                    | 33.5                             | 37.0                             | 35.5                             | 39.5                               |
| Min, Max                  | 25, 54                           | 23, 52                           | 24, 50                           | 30, 48                             |
| <b>Sex, n (%)</b>         |                                  |                                  |                                  |                                    |
| Male                      | 3 (50.0)                         | 4 (66.7)                         | 5 (83.3)                         | 5 (83.3)                           |
| Female                    | 3 (50.0)                         | 2 (33.3)                         | 1 (16.7)                         | 1 (16.7)                           |
| <b>Race, n (%)</b>        |                                  |                                  |                                  |                                    |
| Asian                     | 0                                | 1 (16.7)                         | 2 (33.3)                         | 0                                  |
| Black or African American | 3 (50.0)                         | 0                                | 1 (16.7)                         | 2 (33.3)                           |
| White                     | 3 (50.0)                         | 5 (83.3)                         | 3 (50.0)                         | 4 (66.7)                           |
| Other                     | 0                                | 0                                | 0                                | 0                                  |
| <b>Ethnicity, n (%)</b>   |                                  |                                  |                                  |                                    |
| Hispanic or Latino        | 0                                | 1 (16.7)                         | 0                                | 2 (33.3)                           |
| Non-Hispanic / Non-Latino | 6 (100.0)                        | 5 (83.3)                         | 6 (100.0)                        | 4 (66.7)                           |

|                          |                 |                |                |                |
|--------------------------|-----------------|----------------|----------------|----------------|
| Weight (kg)              |                 |                |                |                |
| n                        | 6               | 6              | 6              | 6              |
| Mean (SD)                | 68.87 (9.985)   | 72.24 (13.538) | 76.32 (13.862) | 75.43 (7.700)  |
| Median                   | 65.77           | 72.12          | 78.93          | 77.51          |
| Min, Max                 | 60.3, 85.7      | 56.7, 91.6     | 54.4, 91.6     | 64.0, 83.9     |
| Height (cm)              |                 |                |                |                |
| n                        | 6               | 6              | 6              | 6              |
| Mean (SD)                | 167.64 (10.255) | 170.50 (8.287) | 173.69 (8.286) | 172.30 (9.252) |
| Median                   | 167.64          | 170.50         | 173.10         | 173.36         |
| Min, Max                 | 154.9, 179.1    | 158.8, 181.6   | 160.0, 185.4   | 161.3, 185.4   |
| BMI (kg/m <sup>2</sup> ) |                 |                |                |                |
| n                        | 6               | 6              | 6              | 6              |
| Mean (SD)                | 24.50 (2.601)   | 24.67 (2.687)  | 25.12 (3.001)  | 25.57 (3.668)  |
| Median                   | 24.33           | 24.67          | 25.69          | 24.88          |
| Min, Max                 | 20.5, 27.7      | 20.2, 27.8     | 21.3, 29.4     | 20.8, 30.8     |
| Body Temperature (°C)    |                 |                |                |                |
| n                        | 6               | 6              | 6              | 6              |
| Mean (SD)                | 36.87 (0.234)   | 37.03 (0.216)  | 36.92 (0.160)  | 36.87 (0.308)  |
| Median                   | 36.90           | 37.10          | 36.90          | 36.95          |
| Min, Max                 | 36.6, 37.1      | 36.6, 37.2     | 36.7, 37.1     | 36.4, 37.2     |

---

*q* every; *SD* standard deviation; *BMI* body mass index

**Supplemental Table 4** Demographic and baseline characteristics for participants treated with fentanyl citrate IV 50 mcg (safety population)

| Characteristic            | Safety population               |                                 |                                 |                                   |
|---------------------------|---------------------------------|---------------------------------|---------------------------------|-----------------------------------|
|                           | Cohort 1<br>50 mcg q4h<br>(N=6) | Cohort 2<br>50 mcg q2h<br>(N=6) | Cohort 3<br>50 mcg q1h<br>(N=6) | Cohort 4<br>50 mcg q0.5h<br>(N=6) |
| Age, y                    |                                 |                                 |                                 |                                   |
| n                         | 6                               | 6                               | 6                               | 6                                 |
| Mean (SD)                 | 39.8 (13.88)                    | 34.8 (6.11)                     | 33.8 (13.20)                    | 33.8 (9.60)                       |
| Median                    | 44.0                            | 33.0                            | 30.0                            | 33.5                              |
| Min, Max                  | 20, 54                          | 29, 46                          | 21, 55                          | 23, 47                            |
| Sex, n (%)                |                                 |                                 |                                 |                                   |
| Male                      | 6 (100.0)                       | 5 (83.3)                        | 4 (66.7)                        | 5 (83.3)                          |
| Female                    | 0                               | 1 (16.7)                        | 2 (33.3)                        | 1 (16.7)                          |
| Race, n (%)               |                                 |                                 |                                 |                                   |
| Asian                     | 0                               | 0                               | 1 (16.7)                        | 1 (16.7)                          |
| Black or African American | 1 (16.7)                        | 2 (33.3)                        | 1 (16.7)                        | 1 (16.7)                          |
| White                     | 5 (83.3)                        | 4 (66.7)                        | 4 (66.7)                        | 4 (66.7)                          |
| Other                     | 0                               | 0                               | 0                               | 0                                 |
| Ethnicity, n (%)          |                                 |                                 |                                 |                                   |
| Hispanic or Latino        | 1 (16.7)                        | 3 (50.0)                        | 2 (33.3)                        | 2 (33.3)                          |
| Non-Hispanic / Non-Latino | 5 (83.3)                        | 3 (50.0)                        | 4 (66.7)                        | 4 (66.7)                          |



|                          |                |                 |                |                |
|--------------------------|----------------|-----------------|----------------|----------------|
| Weight (kg)              |                |                 |                |                |
| n                        | 6              | 6               | 6              | 6              |
| Mean (SD)                | 88.71 (12.746) | 79.98 (12.233)  | 78.04 (16.465) | 74.03 (8.404)  |
| Median                   | 94.01          | 81.65           | 82.28          | 73.37          |
| Min, Max                 | 64.9, 98.4     | 61.7, 95.3      | 55.1, 96.2     | 65.2, 86.2     |
| Height (cm)              |                |                 |                |                |
| n                        | 6              | 6               | 6              | 6              |
| Mean (SD)                | 178.92 (6.017) | 177.06 (12.091) | 171.66 (6.734) | 173.99 (7.492) |
| Median                   | 180.54         | 182.56          | 170.48         | 172.72         |
| Min, Max                 | 167.6, 184.2   | 160.0, 188.0    | 165.1, 180.3   | 162.6, 185.4   |
| BMI (kg/m <sup>2</sup> ) |                |                 |                |                |
| n                        | 6              | 6               | 6              | 6              |
| Mean (SD)                | 27.61 (3.130)  | 25.59 (3.594)   | 26.30 (4.296)  | 24.46 (2.391)  |
| Median                   | 28.21          | 26.38           | 26.63          | 24.37          |
| Min, Max                 | 23.1, 31.1     | 19.1, 29.1      | 20.2, 31.3     | 21.8, 27.3     |
| Body Temperature (°C)    |                |                 |                |                |
| n                        | 6              | 6               | 6              | 6              |
| Mean (SD)                | 36.92 (0.214)  | 36.70 (0.379)   | 37.05 (0.362)  | 36.75 (0.339)  |
| Median                   | 37.00          | 36.65           | 37.00          | 36.70          |
| Min, Max                 | 36.6, 37.1     | 36.1, 37.2      | 36.6, 37.7     | 36.3, 37.3     |

---

*q* every; *SD* standard deviation; *BMI* body mass index
